# Supplementary material for: Intratumoral heterogeneity of programmed cell death ligand-1 expression is common in lung cancer
Source: PubMed Central journal article supplement (PMC5648155; doi:10.1371/journal.pone.0186192), 2017-10-19

Adenocarcinoma, case 31

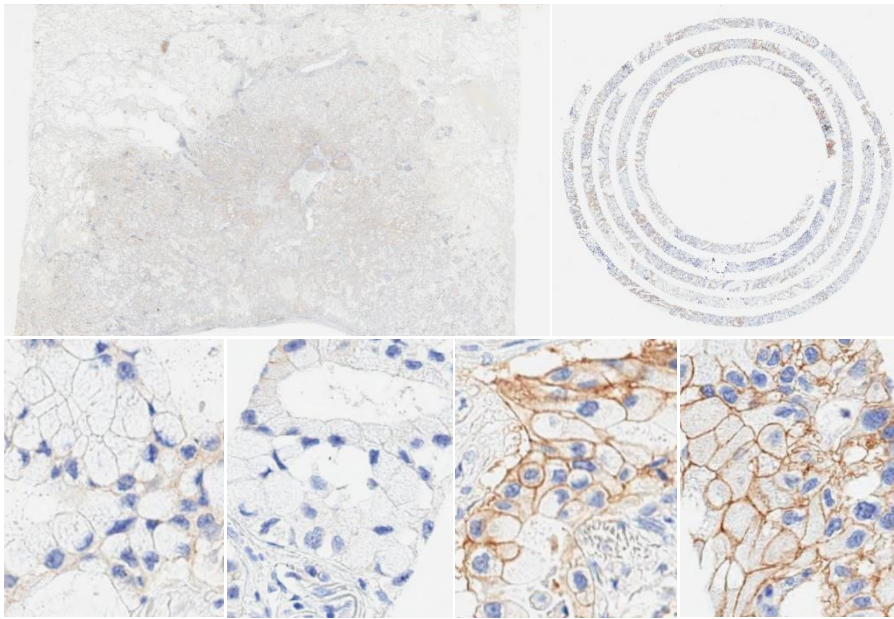

Adenocarcinoma, case 46

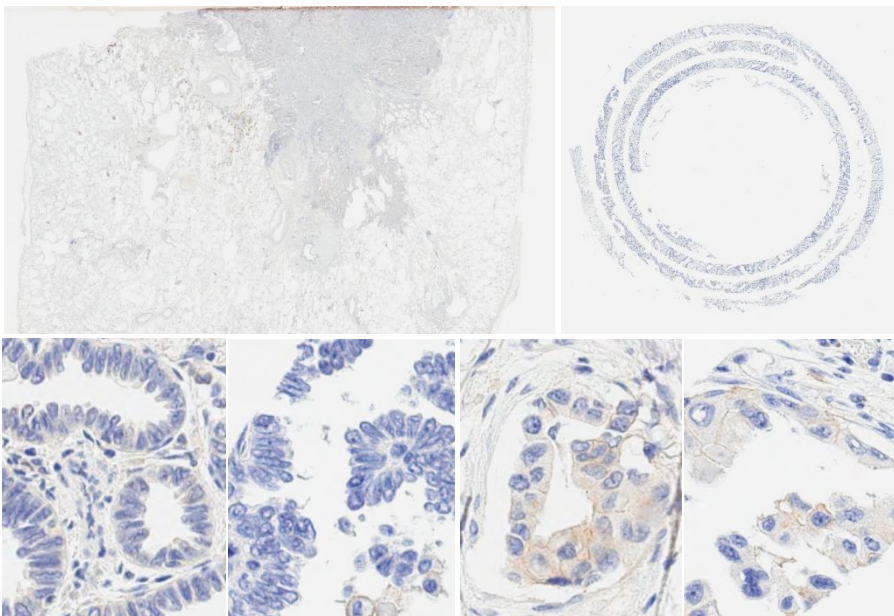

Squamous cell carcinoma, case 5

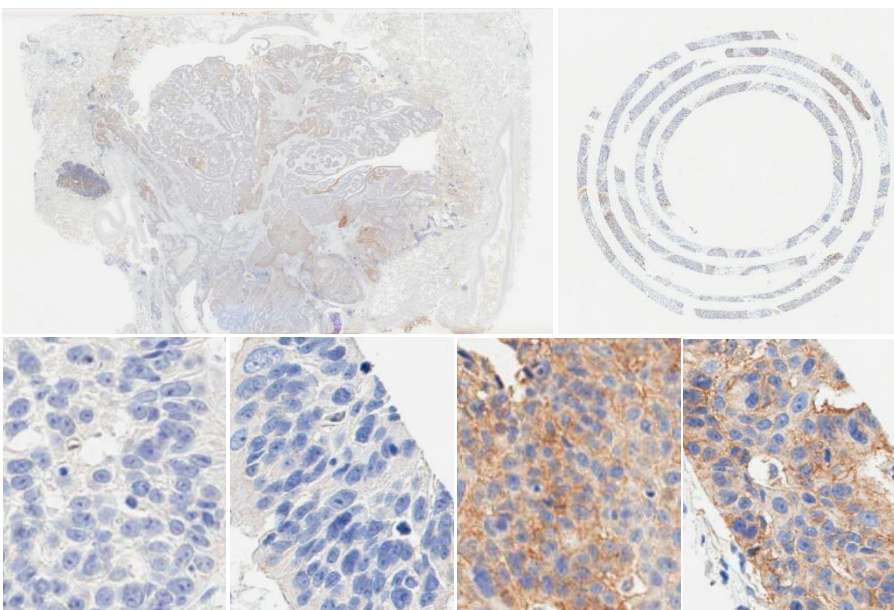

Squamous cell carcinoma, case 21

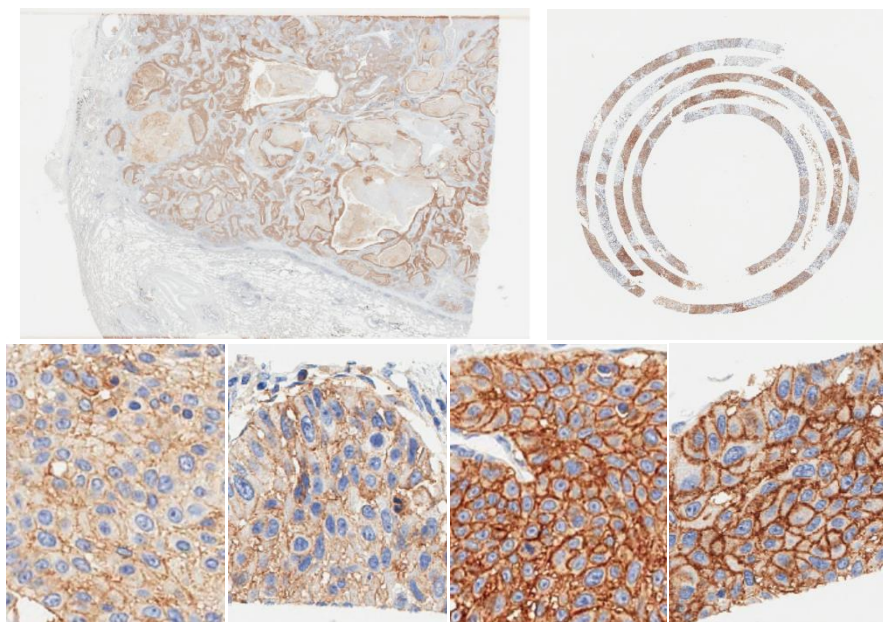

Squamous cell carcinoma, case 31

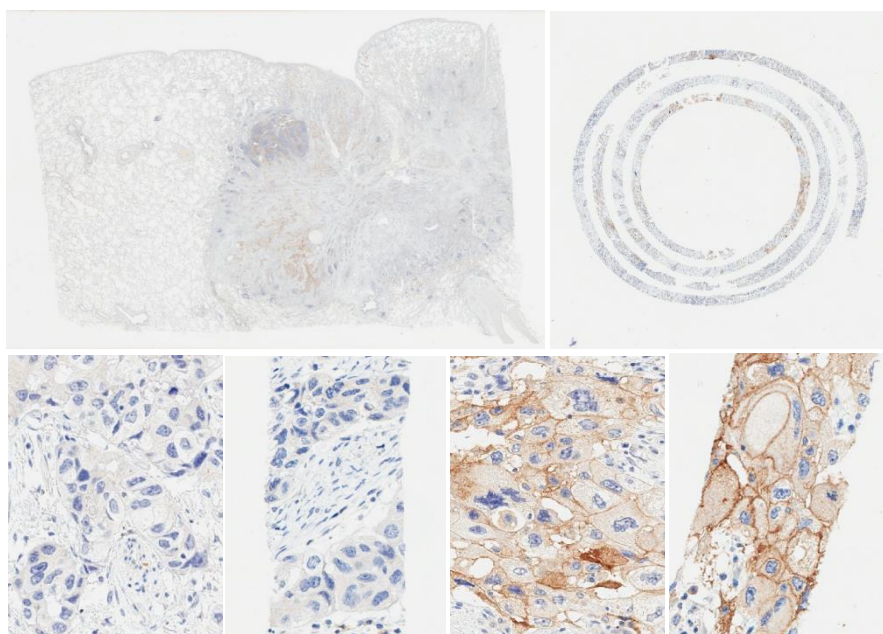

Squamous cell carcinoma, case 53

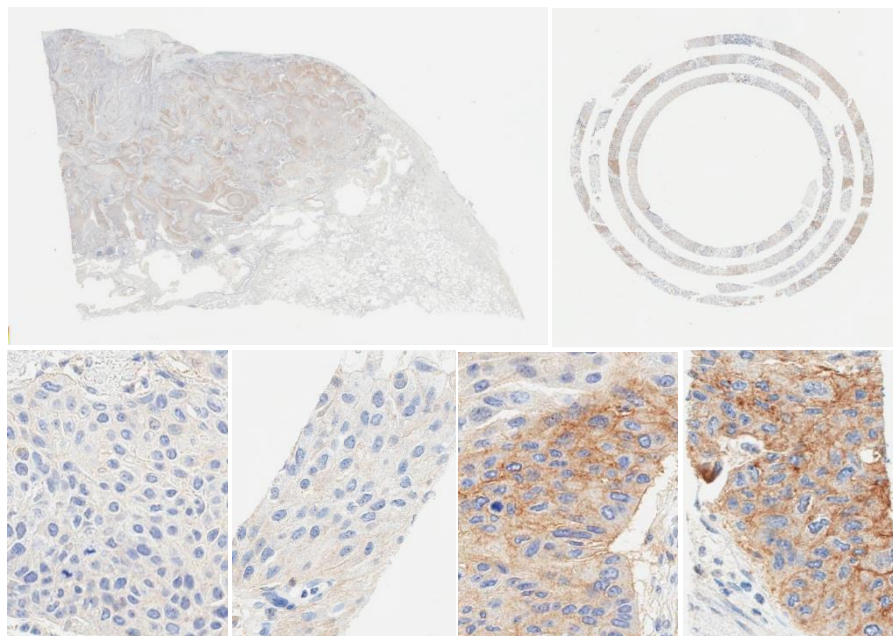

Supplement: pone.0186192.s001.pdf [file pone.0186192.s001.pdf]
